1 **Yeast Genomic Screens Identify Kinesins as Potential Targets of the**  
2 ***Pseudomonas syringae* Type III Effector, HopZ1a**

3

4 Amy Huei-Yi Lee<sup>1‡</sup>, D. Patrick Bastedo<sup>1‡</sup>, Timothy Lo<sup>1</sup>, Maggie A. Middleton<sup>2</sup>, Ji-Young  
5 Youn<sup>3</sup>, Inga Kireeva<sup>2</sup>, Jee Yeon Lee<sup>2</sup>, Sara Sharifpoor<sup>3</sup>, Anastasia Baryshnikova<sup>4</sup>,  
6 Jianfeng Zhang<sup>1</sup>, Pauline W. Wang<sup>2</sup>, Sergio G. Peisajovich<sup>1,2</sup>, Michael Constanzo<sup>3</sup>,  
7 Brenda J. Andrews<sup>3,5</sup>, Charles M. Boone<sup>3,5</sup>, Darrell Desveaux<sup>1,2,†,\*</sup> and David S.  
8 Guttman<sup>1,2,†,\*</sup>

9

10 <sup>1</sup> Department of Cell & Systems Biology, University of Toronto, Toronto, Ontario,  
11 Canada

12 <sup>2</sup> Centre for the Analysis of Genome Evolution & Function, University of Toronto,  
13 Toronto, Ontario, Canada

14 <sup>3</sup> The Donnelly Centre, University of Toronto, Toronto, Ontario, Canada

15 <sup>4</sup> Lewis-Sigler Institute for Integrative Genomics, Princeton University, Princeton, New  
16 Jersey, USA

17 <sup>5</sup> Department of Molecular Genetics, University of Toronto, Toronto, Ontario, Canada

18

19 †To whom correspondence should be addressed:

20 [david.guttman@utoronto.ca](mailto:david.guttman@utoronto.ca) (D.S.G.); [darrell.desveaux@utoronto.ca](mailto:darrell.desveaux@utoronto.ca) (D.D.)

21

22 ‡ These authors contributed equally.

23 \* These authors contributed equally.

1 **RUNNING TITLE**

2 Yeast screen for bacterial targets.

3  
4 **KEYWORDS**

5 *Pseudomonas syringae*, Type III secreted effector, Pathogenic Genetic Array, Yeast  
6 screen, Pathogen-host interactions, HopZ1, Kinesin

7  
8 **ABSTRACT**

9 Gram-negative bacterial pathogens inject type III secreted effectors (T3SEs) directly  
10 into host cells to promote pathogen fitness by manipulating host cellular processes.

11 Despite their crucial role in promoting virulence, relatively few T3SEs have well-  
12 characterized enzymatic activities or host targets. This is in part due to functional  
13 redundancy within pathogen T3SE repertoires as well as promiscuous individual T3SEs  
14 that can have multiple host targets. To overcome these challenges, we conducted  
15 heterologous genetic screens in yeast, a non-host organism, to identify T3SEs that  
16 target conserved eukaryotic processes. We screened 75 T3SEs from the plant  
17 pathogen *Pseudomonas syringae* and identified 16 that inhibited yeast growth on rich  
18 media and eight that inhibited growth on stress-inducing media, including the  
19 acetyltransferase HopZ1a. We focused our further analysis on HopZ1a, which interacts  
20 with plant tubulin and alters microtubule networks. We first performed a Pathogenic  
21 Genetic Array (PGA) screen of HopZ1a against ~4400 yeast carrying non-essential  
22 mutations and found 95 and 10 deletion mutants which reduced or enhanced HopZ1a  
23 toxicity, respectively. To uncover putative HopZ1a host targets, we interrogated both the

1 genetic- and physical- interaction profiles of HopZ1a by identifying yeast genes with  
2 PGA profiles most similar (i.e. congruent) to that of HopZ1a, performing a functional  
3 enrichment analysis of these HopZ1a-congruent genes, and by analyzing previously  
4 described HopZ physical interaction datasets. Finally, we demonstrated that HopZ1a  
5 can target kinesins by acetylating the plant kinesins HINKEL and MKRP1.

6

7

### ARTICLE SUMMARY

8 Bacterial pathogens utilize secretion systems to directly deliver effector proteins into  
9 host cells, with the ultimate goal of promoting pathogen fitness. Despite the central role  
10 that effectors play in infection, the molecular function and host targets of most effectors  
11 remain uncharacterized. We used yeast genomics and protein interaction data to  
12 identify putative virulence targets of the effector HopZ1a from the plant pathogen  
13 *Pseudomonas syringae*. HopZ1a is an acetyltransferase that induces plant microtubule  
14 destruction. We showed that HopZ1a acetylated plant kinesin proteins known to  
15 regulate microtubule networks. Our study emphasizes the power of yeast functional  
16 genomic screens to characterize effector functions.

17

1  
2  
3  
4  
5  
6  
7  
8  
9  
10  
11  
12  
13  
14  
15  
16  
17  
18  
19  
20  
21  
22  
23  
24

## INTRODUCTION

Bacterial pathogens of both plants and animals subvert key host processes in order to suppress host immunity and manipulate nutrient supplies. Many Gram-negative bacterial pathogens achieve this goal by delivering type III secreted effectors (T3SEs) into the host cytosol where they manipulate the host in a variety of ways, including modulating signaling pathways, transcription, intracellular transport, cytoskeletal stability, and host defenses (Büttner and Bonas 2003; Jin et al. 2003; Cornelis 2006; Zhou and Chai 2008; Lewis et al. 2009). Although many bacterial T3SEs have been shown to generally suppress host immunity, we know relatively little about the specific virulence targets and mechanisms of action of most T3SEs. This difficulty in functional characterization of T3SE virulence mechanisms is due to a number of factors, including: (1) redundant targeting of a given host protein by multiple effectors which confounds analysis of individual T3SE deletion mutants; (2) promiscuous individual effectors which can target multiple host proteins, thereby making it difficult to ascribe a virulence function to any individual target (Lewis et al. 2011; Deslandes and Rivas 2012); (3) effectors often show no similarity to proteins or domains with characterized functions, limiting bioinformatic approaches to infer effector functions; and (4) effectors can trigger immune responses as a result of host recognition, which complicates virulence target identification.

In order to gain new insights into the biochemical functions and host targets of bacterial T3SEs, a number of research groups have utilized the model organism *Saccharomyces cerevisiae* (yeast) as a tool (Yoon et al. 2003; Alto et al. 2006; Kramer et al. 2007;

1 Slagowski et al. 2008; Alemán et al. 2009; Munkvold et al. 2009; Salomon and Sessa  
2 2010). The rationale for using yeast to characterize bacterial effectors rests on the fact  
3 that many biological processes (for example central metabolism, the control of  
4 cytoskeleton dynamics, vesicle trafficking, signal transduction, DNA metabolism and cell  
5 cycle processes) are conserved amongst eukaryotes (Siggers and Lesser 2008; Curak  
6 et al. 2009; Botstein and Fink 2011; Dolinski and Botstein 2007). Therefore, effectors  
7 that target a conserved cellular process in a higher eukaryote may also act on the same  
8 cellular process in the simpler and genetically-tractable yeast system. This is particularly  
9 attractive if the original host is not readily amenable to high-throughput assays. Another  
10 advantage of studying bacterial T3SEs in the yeast system is that the expression of  
11 non-effector bacterial proteins does not generally affect yeast growth (Slagowski et al.  
12 2008). This indicates that most fitness defects observed upon T3SE expression in yeast  
13 is specifically due to the T3SE, and not simply due to the heterologous overexpression  
14 of bacterial proteins. Finally, the expression of translocated effector proteins from both  
15 plant and animal pathogens has been shown to inhibit yeast growth by targeting  
16 conserved eukaryotic proteins (Munkvold et al. 2008; Siggers and Lesser 2008; Curak  
17 et al. 2009; Salomon et al. 2011). For instance, the *Yersinia* T3SE YopJ has been  
18 shown to disrupt mammalian innate immunity by preventing the activation of MAPK  
19 kinase (MAPKK) and subsequently blocking the MAPK and NFκB signaling pathways  
20 (Orth et al. 1999; Orth et al. 2000). Even though yeast cells lack key components of the  
21 mammalian innate immune system, YopJ was shown to inhibit MAPK pathways in yeast  
22 by preventing the activation of MAPKK as previously observed in mammalian systems  
23 (Yoon et al. 2003).

1  
2 A number of groups have developed yeast genomics tools to characterize bacterial  
3 effectors that target conserved eukaryotic cellular processes (Alto et al. 2006; Kramer et  
4 al. 2007). A very successful genetic approach is the Pathogenic Genetic Array (PGA), a  
5 variation of the well-established Synthetic Genetic Array (SGA) technology, which  
6 enables high-throughput genetic screens to identify conserved host targets (Alto et al.  
7 2006; Kramer et al. 2007). The SGA technology involves a series of robotics-assisted  
8 cell matings to introduce any marked allele of interest into an array of mutants, allowing  
9 the systematic generation of double mutants and the interrogation of di-genic genetic  
10 interactions at a genome-wide scale (Tong et al. 2001; Tong et al. 2004; Costanzo et al.  
11 2010). Genetic interactions between two mutations are inferred when the observed  
12 double mutant phenotype deviates from the expected phenotype of the combined single  
13 mutants. In extreme cases, a synthetic lethal interaction occurs when the combination of  
14 two non-lethal mutations causes cell death. Large scale, genome-wide SGA screens  
15 have provided genetic interaction profiles for ~75% of the yeast genome (Costanzo et al.  
16 2010). Since genes within the same pathway or bioprocess tend to show very similar  
17 genetic interaction profiles, querying the genetic interactions of an unknown gene  
18 against the nearly complete SGA compendium of the yeast genome can be a powerful  
19 way to predict functions of uncharacterized genes (Costanzo et al. 2010).

20

21 Similar to SGA, PGA queries a pathogen effector against a collection of viable yeast  
22 deletion strains in a high-throughput array format to analyze effector functions. PGA  
23 identifies those yeast deletion mutants that can either reduce or enhance effector-

1 mediated growth defects, and subsequently guides the inference of functional  
2 relationships between these yeast genes and the pathogen T3SEs (Alto et al. 2006;  
3 Kramer et al. 2007). This PGA strategy was first used to identify yeast deletion mutants  
4 that suppress *Shigella* T3SE IpgB2-induced toxicity (Alto et al. 2006). Consistent with  
5 the ability of IpgB2 to interfere with Rho1p signaling in mammalian cells, the genetic  
6 suppressors of IpgB2 in yeast are downstream of Rho1p, part of the cell wall integrity  
7 MAPK-signaling pathway (Alto et al. 2006). Overall this PGA screen revealed that IpgB2  
8 functions as a G protein mimic, capable of activating the Rho1p pathway (Alto et al.  
9 2006).

10

11 In this study, we hypothesized that T3SEs that target evolutionarily conserved plant  
12 processes can regulate the same processes in yeast. Furthermore, if this conserved  
13 process is important for optimal yeast growth, then the overexpression of T3SEs should  
14 decrease yeast fitness. We expressed 73 *P. syringae* T3SEs in yeast and identified 24  
15 effectors that reduced yeast fitness, including HopZ1a<sub>PsyA2</sub>. In addition, PGA analysis  
16 identified yeast genes involved in genetic interactions with HopZ1a; this genetic  
17 interaction profile was compared with previously generated SGA datasets to identify  
18 yeast genes with interaction profiles similar (or congruent) to that of HopZ1a. In theory,  
19 genetic interactors will function in pathways parallel or compensatory to the pathway  
20 targeted by HopZ1a. More specifically, yeast genes with genetic interaction profiles  
21 congruent to that of HopZ1a may potentially represent direct targets of HopZ1a. Among  
22 the yeast genes with HopZ1a-congruent interaction profiles were kinesins, and kinesin  
23 homologs from the model plant host *Arabidopsis thaliana* (hereafter *Arabidopsis*) have

1 been previously shown to physically interact with HopZ1a (Mukhtar et al. 2011; Lewis et  
2 al. 2012). These findings implicate kinesins as putative targets of HopZ1a and we  
3 demonstrated that HopZ1a can acetylate *Arabidopsis* kinesin proteins when co-  
4 expressed in yeast. This study emphasizes the power of high-throughput heterologous  
5 screens for exploration of T3SE function and for identification of conserved eukaryotic  
6 processes that are targeted by diverse pathogens.

7

8

## MATERIALS AND METHODS

9 **Cloning:** Promoter-less coding sequences lacking stop codons of *P. syringae* T3SEs  
10 were PCR-amplified to include the addition of *attB1* and *attB2* linkers and cloned into  
11 the Gateway donor vector, pDONR207, using the Gateway BP reactions. T3SEs from  
12 *PtoDC3000*, *PsyB728a* and *Pph1448a* were generous gifts from J. Chang (Chang et al.  
13 2005). The additional T3SEs from *PmaES4326*, as well as T3SEs from the HopZ and  
14 HopF families were cloned for this study. The pDONR207-T3SE collection was  
15 sequenced-confirmed via Sanger sequencing. These T3SEs were subcloned into the  
16 Gateway-compatible yeast integration vector, pBA2262, using the Gateway LR  
17 reactions. To confirm the pBA2262-T3SE constructs, purified plasmids were digested  
18 with *BsrGI* or *NotI* and the restriction digest patterns were analyzed.

19

20 Promoter-less coding sequences of *A.thaliana* kinesins *HINKEL* (At1g18370) and  
21 *MKRP1* (At1g21730) lacking stop codons were likewise PCR-amplified and cloned into  
22 pDONR207 and were subcloned by Gateway LR reactions into the autonomously-  
23 replicating, single-copy, Gateway-compatible yeast expression vector, pBA350V.



1  
2 **Yeast strain construction, growth medium, immunoblot analyses:** To integrate the  
3  $P_{GAL1}$ -T3SE-FLAG::NAT<sup>R</sup> constructs into the yeast genome at the *HO* locus, the SGA  
4 query strain (Y7092, MAT $\alpha$ , *can1* $\Delta$ ::*STE2pr-Sp\_his5 lyp1* $\Delta$  *his3* $\Delta$ 1 *leu2* $\Delta$ 0 *ura3* $\Delta$ 0  
5 *met15* $\Delta$ 0) was transformed with *NotI*-digested BA2262-T3SE plasmid DNA using the  
6 standard transformation method (Gietz and Woods 2002).

7  
8 For immunoblot analyses, yeast strains expressing the FLAG-tagged T3SEs under  
9 control of the *GAL1* promoter were grown overnight at 30° shaking (200 RPM) in 1 ml of  
10 YP broth with 2% raffinose (YPR) in deep-well plates with sterile glass beads in each  
11 well. The overnight cultures were subsequently diluted into deep-well plates containing  
12 1 ml of YP broth with 2% galactose (YPG) at OD<sub>600</sub> of 0.1. The cultures were induced  
13 for T3SE expression for 7 to 8 hours, or until the cultures reach OD<sub>600</sub> of 1. The 1 ml-  
14 cultures were pelleted at 13,000 x *g* for 1 min, washed, and frozen at -20°. Whole cell  
15 extracts were prepared from TCA-fixed cells as described (Kurat et al. 2009). The  
16 protein pellets were resuspended in 1X sample buffer and neutralized by addition of 2M  
17 Tris solution. The lysates were separated by 12% SDS-PAGE and immunoblot was  
18 performed with mouse anti-FLAG primary antibodies (Sigma, F3165, USA) via  
19 chemiluminescence (Amersham, USA).

20  
21 **Pathogenic genetic array:** The pathogenic genetic array (PGA) analysis was based on  
22 a variation of the SGA method used for synthetic dosage lethality screens (Tong et al.  
23 2001; Sopko et al. 2006). In brief, Y7092 (the SGA query strain) with integrated

1 *HOΔ::GAL1-hopZ1a-FLAG::NAT<sup>R</sup>* was mated into the 1536-density *MATa* deletion  
2 mutant array marked with *KAN<sup>R</sup>*, which represents each single mutant colony four times  
3 on the array. Y7092 carrying *HOΔ::NAT<sup>R</sup>* (SN851) was used as a negative control strain.  
4 The *MATa/α* diploids were selected on YPD supplemented with clonNAT (100 μg/ml)  
5 and G418 (200 μg/ml) at 30° for two days. Diploid cells were pinned onto enriched  
6 sporulation media (20 g/L agar, 10 g/L potassium acetate, 1 g/L yeast extract, 0.5 g/L  
7 glucose, 0.1 g/L amino acids-supplement) and allowed to sporulate at 22° for at least  
8 one week. The spores were pinned onto synthetic dextrose media (SD) – His/Arg/Lys +  
9 clonNAT/canavanine/thialysine and incubated at 30° for two days to select for *MATa*  
10 haploid meiotic progeny. The drugs canavanine and thialysine were used at 50 μg/ml.  
11 The *MATa* haploid meiotic progeny were subsequently pinned onto SD – His/Arg/Lys +  
12 clonNAT/ canavanine/ thialysine/ G418 plates twice to select for the final *MATa* meiotic  
13 progeny carrying both the *kan<sup>R</sup>* (yeast deletion strains) and *NAT<sup>R</sup>* (*GAL1-T3SE-FLAG*  
14 constructs) markers. To induce for T3SE expression, the *MATa* haploid meiotic progeny  
15 from final selection were pinned onto the synthetic galactose (SG) media – His/Arg/Lys  
16 + clonNAT/canavanine/thialysine/G418, plates were incubated at 30° for two day. We  
17 quantified colony sizes using an adapted SGA protocol (Baryshnikova et al. 2010a).

18  
19 **Confirmation of PGA interactors:** Yeast deletion strains that were either putative  
20 suppressors or synthetic lethal interactors from the PGA screens were streaked out on  
21 YPD with 200 μg/ml of G418 (Invitrogen Life Technologies, USA) and incubated at 30°  
22 for 2 – 3 days. Single colonies of each deletion strain were patched onto YPD plates in  
23 1 – 2 cm<sup>2</sup> patches and incubated at 30° for 1 overnight to allow for actively growing

1 yeast cultures. A single colony of wild type yeast from the deletion array border was  
2 also streaked out and patched onto YPD plates as control strains. Each yeast deletion  
3 strain was scraped off from the patches ( $\sim 10^8 - 10^9$  cells) using sterile toothpicks and  
4 arrayed into a 96-well microtiter plate containing 200  $\mu$ l of sterile water. Yeast cells were  
5 washed once with 200  $\mu$ l of 0.1 M lithium acetate by centrifugation for 5 min at 1,500 x *g*  
6 at 20° in a centrifuge with a microtiter plate rotor. Each well of pelleted yeast cells was  
7 resuspended with 180  $\mu$ l of transformation mix (120  $\mu$ l of 50% w/v PEG-3350, 18  $\mu$ l of 1  
8 M lithium acetate, and 25  $\mu$ l of boiled single-stranded carrier DNA). 60  $\mu$ l each of  
9 resuspended cells were subsequently transferred to 96-well microtiter plates containing  
10 either 1  $\mu$ l of purified plasmid DNA pBA350V (empty vector) or 1  $\mu$ l of purified plasmid  
11 DNA (pBA350V-*hopZ1a* and pBA350V-*hopF2*). The remaining 60  $\mu$ l of cells served as a  
12 mock transformation control. The 96-well microtiter plates were incubated at 30° for 30  
13 min followed by heat shock at 42° for 30 min. Cells were harvested by centrifugation for  
14 10 min at 1,500 x *g* at 20° and resuspended in 100  $\mu$ l of SD. 50  $\mu$ l of transformed or  
15 mock-transformed cells were plated on SD-Leu and incubated at 30° for 3 days.  
16 Transformants carrying either pBA350V or pBA350V-T3SE (pBA350V-*hopZ1a* and  
17 pBA350V-*hopF2*) were grown on SD-Leu plates and were subsequently used for  
18 confirmation by spot dilution assays.

19

20 **Spot dilution assay:** For spot dilution assay to determine growth inhibition of Y7092  
21 expressing *P. syringae* T3SEs, 1 ml of cultures were grown at 30° and 200 RPM in YPR  
22 in deep-well plates that contain sterile glass beads in each well. Ten-fold dilution series

1 of the overnight cultures were spotted onto YPD, YPG, YPD with 1 M sorbitol, YPG with  
2 1 M sorbitol, YPD with 1 M NaCl, or YPG with 1 M NaCl.

3

4 For spot dilution assays to confirm the putative PGA hits as either suppressors or  
5 synthetic lethal interactors, the deletion strains carrying either the empty vector  
6 (pBA350V) or the effector of interest (pBA350V-*hopZ1a*) were grown in synthetic drop-  
7 out media lacking Leu with 2% raffinose (SR-Leu) for two overnights at 30° and 200  
8 RPM. The overnight cultures were serially diluted 15-fold and spotted onto SD-Leu, SG-  
9 Leu, SD-Leu and 0.5 M NaCl, or SG-Leu and 0.5 M NaCl. Spot dilutions were grown for  
10 two to three days before being photographed. Spot assays were quantified using an  
11 unbiased visual toxicity score (between 1 to 5), where 1 represented the strongest  
12 toxicity (1 spot grew) and 5 represented the least toxicity (all 5 spots grew). A fitness  
13 defect score was subsequently calculated using the toxicity score to compare the  
14 expected fitness defect to the observed fitness defect of each mutant (Baryshnikova et  
15 al. 2010b; Sharifpoor et al. 2012).

16

17 **Yeast co-expression, immunoprecipitations and sample preparation:** Overnight  
18 cultures of yeast strain Y7092 co-expressing FLAG-tagged HopZ1a (wild type or a  
19 catalytically-inactive mutant, C216A) with putative acetylation targets MKRP1 or  
20 HINKEL were diluted into fresh SD-Leu (2% raffinose) and allowed to grow at 30° for  
21 two doublings prior to inducing expression of effector and targets by addition of  
22 galactose to a final concentration of 2%. Following 15 h of induction, cultures were  
23 mechanically lysed and lysates were incubated with an anti-FLAG agarose resin

1 (Sigma). After washing the resin to remove unbound proteins, FLAG-tagged proteins  
2 were eluted by incubating with 100  $\mu$ L of FLAG peptide solution (150 $\mu$ g/mL FLAG  
3 peptide in TBS) for one hour at 4°. Eluted material was dried to a pellet under vacuum  
4 and stored at -80° prior to subsequent mass spectrometry analysis. Dried protein  
5 samples were re-solubilized in 50 mM ammonium bicarbonate (pH 7.8) and then  
6 subjected to reduction with dithiothreitol at 56°, alkylation with iodoacetamide at room  
7 temperature, and overnight digestion with sequencing-grade trypsin (Promega, Madison,  
8 WI) at 37°. The enzymatic reactions were stopped with 3% formic acid, purified and  
9 concentrated with Pierce C18 Spin Columns (Thermo Scientific) and again dried to a  
10 pellet under vacuum. Peptide samples were then solubilized in 0.1% formic acid prior to  
11 LC-MS/MS analyses.

12

### 13 **LC-MS/MS Analysis of Proteins, Chromatography and Mass Spectrometry:**

14 Samples were analyzed on a linear ion trap-Orbitrap hybrid analyzer outfitted with a  
15 nano spray source and EASY-nLC 1200 nano-LC system. The instrument method  
16 consisted of one MS full scan (400–1400  $m/z$ ) in the Orbitrap mass analyzer, an  
17 automatic gain control target of 500,000 with a maximum ion injection of 500 ms, one  
18 microscan, and a resolution of 60,000. Six data-dependent MS/MS scans were  
19 performed in the linear ion trap using the three most intense ions at 35% normalized  
20 collision energy. The MS and MS/MS scans were obtained in parallel fashion. In MS/MS  
21 mode automatic gain control targets were 10,000 with a maximum ion injection time of  
22 100 ms. A minimum ion intensity of 1000 was required to trigger an MS/MS spectrum.  
23 The dynamic exclusion was applied using an exclusion duration of 145s.

1  
2 **Protein ID and Database Searching:** Proteins were identified by searching all MS/MS  
3 spectra against a large *Arabidopsis* database with the addition of the *hopZ* sequences  
4 (extracted from the NCBI database) using SEQUEST (Thermo Scientific™ Proteome  
5 Discoverer™ software). A fragment ion mass tolerance of 0.6 Da and a parent ion  
6 tolerance of 10 ppm were used. Up to two missed tryptic cleavages were allowed.  
7 Methionine oxidation (+15.99492 Da), cysteine carbamidomethylation (+57.02146 Da),  
8 and acetylation (+42.01057 Da) were set as variable modifications. The generated  
9 search results were imported into the Scaffold data analysis platform, an X!Tandem  
10 search (Beavis Informatics, Winnipeg, MA) was performed and the peptides were  
11 evaluated using a false discovery rate of 0.1% as determined using a reversed version  
12 of the database used in the original search. A mzident.xml file was generated from  
13 Scaffold and imported into Scaffold PTM (Proteome Software, Portland, OR) to evaluate  
14 and score the post translational modifications.

15  
16 **Data availability:** All yeast strains and plasmids described in this study are available  
17 upon request. Supplemental Table 1, Supplemental Figures (1-9), and mass  
18 spectrometry raw data files are available at Figshare. TableS1.xlsx: congruence scores  
19 for yeast genes with genetic interaction profiles similar to that of HopZ1a. FigureS1.tiff:  
20 immunoblot analysis of yeast strain Y7092 expressing *P. syringae* T3SEs. FigureS2.tiff:  
21 spot dilution assays to determine growth inhibition profiles of yeast expressing *P.*  
22 *syringae* T3SEs. FigureS3.tiff: genome-wide phenotypic screens to identify yeast  
23 deletion strains that suppressed or were sensitized to *P. syringae* T3SE expression.

1 FigureS4.pdf: extracted ion chromatograms, reversed phase chromatography and  
2 MS/MS spectra supporting identification of two distinct (singly) acetylated forms of the  
3 doubly charged HINKEL peptide, VFGPESLTENVYEDGVK. FigureS5.pdf: extracted ion  
4 chromatograms, reversed phase chromatography and MS/MS spectra supporting  
5 acetylation of the doubly and triply charged MKRP1 peptide, EISCLQEELTQLR.  
6 FigureS6.pdf: extracted ion chromatograms, reversed phase chromatography and  
7 MS/MS spectra supporting acetylation of the doubly and triply charged MKRP1 peptide,  
8 EIYNETALNSQALEIENLK. FigureS7.pdf: extracted ion chromatograms, reversed  
9 phase chromatography and MS/MS spectra supporting acetylation of the doubly and  
10 triply charged HopZ1a peptide, ELLDDETPSNTQFSASIDGFR. FigureS8.pdf: zoomed-  
11 in views of the extracted ion chromatograms presented in Figure S7. FigureS9.pdf:  
12 acetylated HINKEL residues are proximal to the kinesin ATP-binding site. FileS1.tar:  
13 mass spectrometry raw data files from co-expression of HINKEL and MKRP1 with  
14 HopZ1a (HINKEL\_HopZ1a\_wt.raw, HINKEL\_HopZ1a\_CA.raw,  
15 MKRP1\_HopZ1a\_wt.raw, MKRP1\_HopZ1a\_CA.raw).

16  
17

## 18 RESULTS

### 19 ***P. syringae* T3SEs Compromise Yeast Fitness**

20 We performed a fitness-based screen of *P. syringae* T3SEs in yeast to gain insights into  
21 the molecular functions of phytopathogenic T3SEs. We screened T3SEs from three  
22 widely studied *P. syringae* strains: 22 T3SEs from *P. syringae* pv. *tomato* DC3000  
23 (*Pto*DC3000); 12 T3SEs from *P. syringae* pv. *syringae* B728a (*Psy*B728a); and 17

1 T3SEs from *P. syringae* pv. *phaseolicola* 1448A (*Pph1448a*). These three strains have  
2 finished genome sequences and represent three of the five major *P. syringae*  
3 phylogroups (phylogroups 1, 2, and 3, respectively) (Hwang et al. 2005). We also  
4 screened 12 T3SEs from *P. syringae* pv. *maculicola* ES4326 (*PmaES4326*), which  
5 belongs to phylogroup 4. Finally, we screened three additional T3SEs from the HopZ  
6 family and nine additional T3SEs from the HopF family, as these two effector families  
7 are of particular interest to our group (Figure 1) (Ma et al. 2006; Lewis et al. 2008;  
8 Wilton et al. 2010).

9  
10 For each of these 75 T3SEs, we made yeast strains with chromosomal integrations that  
11 introduce a single copy of the T3SE and a drug resistance cassette (*NAT<sup>R</sup>*) at the *HO*  
12 locus – a neutral, dispensable locus not functionally required in stable haploid or diploid  
13 cells (Baganz et al. 1997). Each T3SE was tagged with a C-terminal FLAG epitope and  
14 expressed under the control of a galactose-inducible promoter. We confirmed  
15 galactose-dependent expression of 73 T3SEs using western blot analysis (Figure S1).

16  
17 In order to examine the phenotypic consequence of T3SE expression in yeast, we used  
18 serial dilution spot assays on rich media with glucose (T3SE-repressing) and with  
19 galactose (T3SE-inducing) media to identify those *P. syringae* effectors that inhibit yeast  
20 growth. As expected, we did not observe fitness defects on T3SE-repressing media  
21 (Figure S2) compared to the negative control strain (*HOΔ::NAT<sup>R</sup>*), however, the  
22 expression of 16 out of 73 T3SEs inhibited yeast growth on T3SE-inducing rich media  
23 (Figures 1 and S2: AvrE<sub>*Pph1448a*</sub>, AvrE<sub>*PsyB728a*</sub>, HopAA1<sub>*PmaES4326*</sub>, HopAA1<sub>*PsyB728a*</sub>,



1 HopAA1-1<sub>PtoDC3000</sub>, HopAD1<sub>PtoDC3000</sub>, HopAE1<sub>Pph1448a</sub>, HopAE1<sub>PsyB728a</sub>, HopAG1<sub>PsyB728a</sub>,  
2 HopBB1<sub>PavBPIC631</sub>, HopF2<sub>PtoT1</sub>, HopG1<sub>Pph1448a</sub>, HopM1<sub>PsyB728a</sub>, HopW1-1<sub>PmaES4326</sub>,  
3 HopX1<sub>PsyB728a</sub> and HopX1<sub>PmaES4326</sub>).

4  
5 To identify additional T3SEs that may target conserved cellular processes under stress  
6 conditions, we also performed fitness assays on media inducing hyperosmotic stress  
7 (containing 1 M sorbitol or 1 M NaCl). Eight additional T3SEs altered yeast fitness when  
8 induced in the presence of high osmolytes (Figures 1, S2 and S3). Four of the  
9 *PtoDC3000* T3SEs caused enhanced fitness defects in yeast both with 1 M sorbitol and  
10 with 1 M NaCl (HopAA1-2, HopAO1, HopT1-1, and HopX1). Although 1 M sorbitol and 1  
11 M NaCl both activate the high osmolarity glycerol (HOG) pathway by creating a high  
12 osmolarity environment, NaCl stress creates additional toxicity by altering the ion  
13 homeostasis in the cell (Giaever et al. 2002). We also identified a single T3SE that  
14 affected yeast fitness only in the presence of 1 M sorbitol (HopG1<sub>PtoDC3000</sub>) and three  
15 T3SEs that altered yeast fitness only in the presence of 1 M NaCl (HopAV1<sub>Pph1448a</sub>,  
16 HopN1<sub>PtoDC3000</sub> and HopZ1a<sub>PsyA2</sub>).

### 17 18 **Identifying genetic interactors of HopZ1a by PGA analysis**

19 To further characterize *P. syringae* T3SE functions and their mechanisms of toxicity in  
20 yeast, we utilized the yeast PGA functional genomics approach. We applied a PGA  
21 screen to the T3SE HopZ1a<sub>PsyA2</sub> (hereafter HopZ1a), which we have previously shown  
22 can bind to tubulin and can alter microtubule networks *in planta* (Lee et al. 2012). We  
23 therefore sought to further investigate the role of HopZ1a in regulating microtubule

1 dynamics (and potentially other processes as well) by examining its genetic interaction  
2 network in yeast.

3

4 To this end, we performed a PGA screen by crossing our integrated HopZ1a-expressing  
5 strain with ~4400 haploid yeast non-essential gene deletion mutants (Giaever et al.  
6 2002), looking for those null alleles that either reduced or enhanced HopZ1a-toxicity  
7 (Figure S3C). By comparing the colony size of each deletion mutant on glucose (T3SE-  
8 repressing) or galactose (T3SE-inducing) media, we classified those deletion mutants  
9 with increased or decreased colony size compared to a control array as either  
10 suppressors or negative genetic interactors of HopZ1a activity, respectively. The control  
11 array was constructed by crossing the same array of ~4400 deletion mutants with a  
12 query strain carrying only the *NAT<sup>R</sup>* drug resistance cassette at the *HO* locus (no  
13 integrated T3SE). This allowed identification of yeast deletion mutants that were  
14 sensitive to galactose and/or NaCl even in the absence of HopZ1a expression. In  
15 addition, each array plate of haploid deletion strains contained a border of wild-type  
16 yeast carrying the necessary selectable markers for the experimental procedure to  
17 correct for border effects. Lastly, to ensure that the expression of HopZ1a did not inhibit  
18 yeast mating or sporulation, all of the strain construction steps utilized glucose-  
19 containing media to repress HopZ1a expression.

20

21 Given that wild type HopZ1a only inhibited yeast growth at high osmolarity (1 M NaCl),  
22 we assessed the fitness of ~4400 deletion mutants carrying *GAL-hopZ1a* on media  
23 containing galactose and various concentrations of NaCl. At 0.25 M and 0.5 M NaCl, we

1 initially identified 137 deletion mutants with reduced HopZ1a toxicity (suppressors) and  
2 53 deletion mutants with enhanced HopZ1a toxicity (negative genetic interactors; data  
3 not shown). To confirm the phenotypes of these 190 deletion mutants, we conducted a  
4 secondary screen by transforming the same haploid yeast deletion strains with a single  
5 copy plasmid (pBA350V) carrying *GAL-hopZ1a*, and then used spot dilution assays to  
6 characterize fitness. After excluding those strains with deletions in dubious open  
7 reading frames (Winzeler et al. 1999; Giaever et al. 2002; Kramer et al. 2007) and  
8 galactose metabolism genes, a remaining 95 suppressors and 10 negative genetic  
9 interactors were confirmed by independent transformation and spot dilution assays on  
10 0.5 M NaCl and galactose (Figure 2).

11

## 12 **Biological processes enriched in HopZ1a PGA profiles**

13 We utilized the Gene Ontology (GO) vocabulary to identify biological processes  
14 associated with the confirmed HopZ1a PGA interaction partners, since GO processes  
15 that are enriched within this genetic interaction data set may potentially illuminate  
16 functional processes that are influenced by HopZ1a (Kramer et al. 2007; Baryshnikova  
17 et al. 2010b). We analyzed HopZ1a suppressors using the *Saccharomyces* Genome  
18 Database (SGD) GO Term Finder (Hong et al. 2008) and found a significant enrichment  
19 of genes involved in GTPase-mediated signal transduction and its regulation (Figure 2B;  
20  $p=0.006$ ). Specifically, we identified two Rho GTPase activating proteins that are critical  
21 for cell polarity and cell division: BEM2 and BEM3; as well as two GDP/GTP exchange  
22 proteins: ROM1 and ROM2.

23

1 We did not identify significant enrichment of GO processes in the HopZ1a negative  
2 genetic interactors. However, two negative genetic interactors of HopZ1a, YKE2 and  
3 BER1, are involved in regulating tubulin folding and microtubule-related processes  
4 (Figure 2A). Additionally, we identified both suppressors (BEM2, BEM3 and RRD1) and  
5 negative genetic interactors (SLA1) that are involved in regulating the actin cytoskeleton  
6 (Figure 2A and B). Actin and microtubule cytoskeletons are both involved in  
7 fundamental processes such as cell division and intracellular trafficking, raising the  
8 intriguing possibility that our genetic interaction screen identified genes whose functions  
9 influence both of these two important cytoskeletal components.

10

### 11 **Predicting HopZ1a targets by congruence analysis of genetic interactors**

12 Analysis of the HopZ1a genetic interactors revealed several biological processes that  
13 may be disrupted by HopZ1a, yet this information provided limited insight regarding its  
14 direct targets. We therefore sought to predict direct targets by identifying yeast gene  
15 disruptions that show similar (i.e. congruent) genetic interaction profiles to HopZ1a. This  
16 approach is similar to one used previously to identify drug targets in yeast (Costanzo et  
17 al. 2010) and assumes that if HopZ1a activity disrupts a given target protein's function  
18 in yeast, the HopZ1a PGA profile would be similar (or 'congruent') to the SGA profile of  
19 the corresponding gene knockout strain lacking this putative target (Figure 3A and B).  
20 We focused our congruency analyses on negative genetic interactors since previous  
21 work has indicated that these interactions are easier to interpret than suppressors (Ye  
22 et al. 2005).

23

1 To identify yeast genes with HopZ1a-congruent genetic interaction profiles, we  
2 compared our HopZ1a genetic interaction profile with those of 1712 single yeast  
3 mutants (encompassing ~170,000 interactions) and calculated the pairwise overlap of  
4 genetic interactions (Costanzo et al. 2010) using a previously established congruence  
5 score (Ye et al. 2005). For any particular congruent gene pair, the significance of the  
6 overlap increases with increasing congruence score (Table S1). We identified 99 yeast  
7 genes with congruence scores  $\geq 2$ , indicating similarity to the negative genetic  
8 interaction profile of HopZ1a (Figure 3C and Table S1). This set of yeast genes with  
9 congruent interaction profiles was significantly enriched for genes involved in replication  
10 fork processing ( $p < 0.0001$ ) and for genes involved in microtubule-based processes  
11 ( $p < 0.0004$ ) (Figure 3C). We were particularly interested in this second group of genes,  
12 which includes several microtubule-directed motor proteins such as kinesins (i.e. CIN8,  
13 KIP2, VIK1, and KAR3) and proteins in the dynein-dynactin complex (i.e. NIP100 and  
14 DYN1) (Figure 3C).

15

## 16 **Bridging genetic and physical interaction data**

17 Given that the natural arena for HopZ1a activity is within plant cells, we examined our  
18 set of yeast genes showing genetic interactions with HopZ1a for functional overlap with  
19 datasets from two previous studies that had identified direct physical interactions  
20 between *A. thaliana* genes and *P. syringae* T3SEs by using yeast two-hybrid screens  
21 (Mukhtar et al. 2011; Lewis et al. 2012). Of note, *Arabidopsis* kinesins were identified as  
22 HopZ-interacting proteins in both of these previous studies. This overlap between the

1 genetic and physical interactions observed for HopZ1a motivated further investigation  
2 into whether *Arabidopsis* kinesins represent direct targets of HopZ1a activity.

3

#### 4 **HopZ1a acetylates plant kinesins**

5 Kinesins are microtubule-based motor proteins involved in many cellular processes,  
6 including intracellular transport, mitotic cell division, signaling, and microtubule  
7 organization (Zhu and Dixit 2012). The kinesins previously shown to participate in direct  
8 physical interactions with HopZ family members are the mitochondrially-localized  
9 MKRP1 (At1g21730) and MKRP2 (At4g39050) (Mukhtar et al. 2011; Lewis et al. 2012).  
10 Since mitochondrial localization of HopZ1a has not been observed (Lewis et al. 2008),  
11 we also investigated whether HopZ1a may target related kinesins belonging to the  
12 same family as MKRP1 and 2 (i.e. the Kinesin 7 family) (Zhu and Dixit 2012). Of  
13 particular interest was the *A. thaliana* HINKEL protein (also known as AtNACK1 or HIK),  
14 which is involved in regulating microtubule stability in plants (Strompen et al. 2002;  
15 Takahashi et al. 2010; Komis et al. 2011).

16

17 HopZ1a is an acetyltransferase with multiple eukaryotic targets, including tubulin and  
18 the *A. thaliana* pseudokinase ZED1 (Lee et al. 2012; Lewis et al. 2013). To test whether  
19 HopZ1a acetylates kinesins *in vivo*, we used liquid chromatography tandem mass  
20 spectrometry (LC-MS/MS) to identify acetylated peptides of both HINKEL and MKRP1.  
21 As previously described for the *Arabidopsis* pseudokinase, ZED1 (Lewis et al. 2013),  
22 we co-expressed HopZ1a in yeast with each candidate kinesin, all as FLAG-tagged  
23 recombinant proteins. LC-MS/MS analysis of anti-FLAG immunoprecipitates identified

1 acetylated peptides from both kinesins (mass increases in multiples of 42 Daltons)  
2 present when co-expressed with wild type HopZ1a but not with the catalytically inactive  
3 mutant, HopZ1a<sup>C216A</sup> (Figure 4). Candidate acetylation sites were confirmed by manual  
4 inspection of extracted ion chromatograms, reversed phase chromatography and  
5 MS/MS spectra (Figures S4-S8 and data not shown).  
6  
7 In this way we identified two distinct acetylated species of the same HINKEL peptide  
8 (VFGPESLTENVYEDGVK; residues 83-99) - 'peptide A' (VFGPE[S-Ac]LTENVYEDGVK,  
9 acetylated at S88) and 'peptide B' (VFGPESL[T-Ac]ENVYEDGVK, acetylated at T90)  
10 (Figures 4A, S4). We also identified acetylated peptides from two distinct sites in  
11 MKRP1 - 'peptide C' (EISCLQEEL[T-Ac]QLR; residues 416-428; acetylated at T425)  
12 and 'peptide D' (EIYNE[T-Ac]ALNSQALEIENLK; residues 815-33; acetylated at T820)  
13 (Figures 4B, S5 and S6). Similar analysis of the HopZ1a-derived peptides from those  
14 cells co-expressing MKRP1 indicates auto-acetylation of HopZ1a at three sites in close  
15 proximity (T342, S344, T346) (Figures 4, S7, S8) and we did not observe acetylation of  
16 HopZ1a in samples from yeast expressing HopZ1a<sup>C216A</sup>. As for cell co-expressing  
17 HINKEL and HopZ1a, we identified HopZ1a peptides that represent distinct  
18 modifications of the same amino acid sequence (ELLDDETPSNTQFSASIDGFR;  
19 residues 336-356) – 'peptide E' was singly acetylated at S344 (ELLDDETP[S-  
20 Ac]NTQFSASIDGFR), while 'peptide F' was doubly acetylated at T342 and T346  
21 (ELLDDE[T-Ac]PSN[T-Ac]QFSASIDGFR). These findings are consistent with a recent  
22 report that also described auto-acetylation of T346 (Ma et al. 2015).

23

## DISCUSSION

1  
2 In this study, we took advantage of the genetic tractability of yeast to identify putative  
3 targets of the T3SE HopZ1a from the plant pathogen *P. syringae*. By integrating and  
4 expressing 73 *P. syringae* T3SEs in yeast, we identified 24 effectors that altered yeast  
5 fitness on rich media or under high osmolarity conditions, including HopZ1a. We then  
6 used a high-throughput PGA screen and analysis of physical interaction datasets to  
7 identify kinesin targets of the T3SE, HopZ1a.

8  
9 Previous studies have identified bacterial phytopathogen T3SEs that altered yeast  
10 fitness (Munkvold et al. 2008; Salomon et al. 2011). Of the 27 *PtoDC3000* effectors  
11 tested by Munkvold *et al.*, 7 inhibited yeast growth (Munkvold et al. 2008; Munkvold et al.  
12 2009). We tested 20 of these same 27 *PtoDC3000* effectors and observed fitness  
13 phenotypes consistent with these previous data in all cases except for HopAO1, HopD1  
14 and HopN1 (Munkvold et al. 2008; Munkvold et al. 2009). While we integrated T3SEs  
15 into the yeast genome and expressed them as single copy genes, Munkvold *et al.*  
16 expressed T3SEs on a high-copy plasmid. Differences in gene dosage may thus be  
17 contributing to the three instances where our data diverge from this previous report.

18  
19 Our initial screen provides numerous interesting leads for further study. Notably, *P.*  
20 *syringae* T3SEs encoded in the conserved effector locus (CEL) caused severe fitness  
21 defects in yeast (Figure 1). T3SEs of the CEL are conserved across most *P. syringae*  
22 strains and typically include the evolutionarily unrelated T3SEs AvrE, HopM1, and  
23 HopAA1 (Alfano et al. 2000). *Pph1448a* has nonfunctional alleles of HopM1 and



1 HopAA1 (Joardar et al. 2005), while *Pto*DC3000 contains an additional effector in its  
2 CEL, HopN1 (O'Brien et al. 2011). The CEL has been shown to play an important role in  
3 bacterial virulence (Alfano et al. 2000; Badel et al. 2003; Munkvold et al. 2009) and in  
4 the suppression of salicylic acid (SA)-mediated basal immunity (DebRoy et al. 2004).  
5 However, with the exception of HopM1 (Nomura et al. 2006; Nomura et al. 2011), the  
6 host targets and the mechanisms by which T3SEs in the CEL promote virulence are not  
7 well characterized. Our results suggest that most CEL T3SEs may have evolved to  
8 target conserved components of eukaryotic processes. The CEL T3SE-induced yeast  
9 fitness defects observed in this study will provide an important tool to help identify  
10 virulence targets of this ubiquitous class of phytopathogen T3SEs.

11  
12 The PGA approach can be used to infer the function of T3SEs by identifying those yeast  
13 genes whose deletions either suppress or enhance T3SE lethality. Intuitively, deletion  
14 strains that suppress T3SE lethality (known as suppressors) can reveal genes involved  
15 in the same pathways as putative T3SE targets. This can be particularly informative  
16 when the T3SE activates a pathway resulting in toxicity, as was observed with the  
17 *Shigella* T3SE IpgB2 which activates the Rho1p GTPase signaling pathway in yeast  
18 (Alto et al. 2006). However, one caveat of the suppressor screen is that we may identify  
19 mutants that suppress T3SE lethality by a general mechanism (i.e. by induction of a  
20 general stress response); such genes are unlikely to be informative for the inference of  
21 T3SE function.

22

1 Deletion mutants that exacerbate the fitness cost of T3SE activity can be explained by  
2 either of two alternate mechanisms resulting in ‘negative genetic interactions’. In one  
3 case, the T3SE acts in the same pathway as the ‘negative genetic interactor’, resulting  
4 in cumulative insults to an essential pathway or complex (Boone et al. 2007; Dixon et al.  
5 2009). Alternatively, the T3SE and ‘negative genetic interactor’ may act on parallel  
6 pathways, which redundantly contribute to an essential function (Figure 3A) (Boone et al.  
7 2007; Dixon et al. 2009). Our analysis of both suppressors and negative genetic  
8 interactors revealed enrichment of signal transduction pathways involving small-  
9 GTPases and may reflect an ability of HopZ1a to influence these cellular processes.  
10 However, in order to gain further insight into the direct targets of HopZ1a we also  
11 applied congruence analysis to compare SGA interaction profiles of 1712 yeast deletion  
12 mutants (Costanzo et al. 2010) with the HopZ1a PGA interaction profile described in  
13 this study. This approach is conceptually similar to the integration of chemical-genetic  
14 and SGA datasets for identification of drug targets (Costanzo et al. 2010); functional  
15 inhibition of a target protein by drug or by T3SE is expected to mimic the consequences  
16 of the corresponding target gene’s deletion, resulting in similar/congruent genetic  
17 interaction profiles.

18  
19 Applying these principles, we identified SGA profiles that were most similar to the  
20 HopZ1a PGA profile and analyzed them for functional enrichment. Genes involved in  
21 replication fork processing ( $p < 0.0001$ ) and microtubule-based processes ( $p < 0.0004$ )  
22 were enriched in the subset with HopZ1a-congruent interaction profiles. We were  
23 particularly interested in microtubule-associated processes since HopZ1a can disrupt

1 microtubules in plants and interacts with tubulin in both plant and animal cells (Lee et al.  
2 2012). Indeed, kinesins (known microtubule-guided motor proteins) were identified not  
3 only through our congruency analysis, but also by two independent yeast-two hybrid  
4 screens for *Arabidopsis* proteins that bind to related HopZ family members. The fact  
5 that kinesins are found at the intersection of these three independent datasets indicates  
6 that members of this family may indeed represent *bona fide*, direct targets of HopZ1a. In  
7 support of this possibility, HopZ1a can acetylate both of the *Arabidopsis* kinesins  
8 HINKEL and MKRP1 (Figure 4).

9  
10 The acetylated sites (S88, T90) of HINKEL are found within its kinesin motor domain  
11 (Figure 4A), and mapping these to the corresponding positions in the structure of  
12 human kinesin CENP-E (Garcia-Saez et al. 2004) reveals a close proximity to the  
13 nucleotide-binding pocket (Figure S9). In *A. thaliana*, HINKEL activates the  
14 ANP1/ANQ1/MPK4 MAPK pathway that ultimately regulates microtubule-bundling  
15 proteins (e.g. MAP65) via phosphorylation (Komis et al. 2011). Our data suggest a  
16 possible mechanism for HopZ1a-mediated antagonism of this pathway whereby  
17 nucleotide binding and/or hydrolysis activity is altered following acetylation of sites  
18 proximal to the nucleotide-binding pocket of HINKEL.

19  
20 Although HopZ1a has not been detected in mitochondria, we cannot rule out the  
21 possibility that the mitochondrial kinesins identified by yeast two-hybrid assays are also  
22 targeted by HopZ1a, especially considering that they are targeted by the *P. syringae*  
23 T3SE HopG1 and are involved in plant immunity (Shimono et al. 2016). HopZ1a

1 acetylates MKRP1 at two distinct sites: T425 is just ‘downstream’ of the kinesin motor  
2 domain while T820 is near its C-terminus (Figure 4B). In *Nicotiana*, the HINKEL ortholog  
3 NACK1 is phosphorylated near the C-terminus at residues T675, T690 and T836 by  
4 cyclin-dependent kinases to regulate microtubule dynamics during cytokinesis (Sasabe  
5 et al. 2011). Although reasonable speculation might suggest that C-terminal acetylation  
6 could disrupt hypothetical phosphorylation sites of MKRP1 and other kinesins, MKRP1  
7 however lacks the C-terminal DUF3490 domain common to HINKEL and NACK1  
8 (Figure 4) and we did not detect HopZ1a acetylation at the C-terminus of HINKEL.  
9  
10 Additional acetylation sites may exist on HINKEL and MKRP1 (and HopZ1a) since LC-  
11 MS/MS analysis is unable to detect all peptides generated from trypsin digests of the  
12 proteins of interest; we only acquired 47-51% coverage of HINKEL, 56-63% coverage of  
13 MKRP1, and 43-55% coverage of HopZ1a (Figure 4). Thus, our acetylation analysis is  
14 conservative and it remains possible that HopZ1a acetylates additional residues of  
15 HINKEL and/or MKRP1 that we were unable to observe. Although HINKEL is acetylated  
16 within its kinesin motor domain at positions S88 and T90, the corresponding residues  
17 were not acetylated in MKRP1. The acetylation sites of MKRP1 are not present in  
18 HINKEL (not shown) and HINKEL has a C-terminal DUF3490 domain that is absent  
19 from MKRP1 (Figure 4). Thus, if acetylation of these two kinesins is an important  
20 function of HopZ1a *in planta*, they are likely to be regulated by contrasting mechanisms.  
21 Nevertheless, these data indicate that HopZ1a can target *A. thaliana* Kinesin 7 family  
22 members.

23

1 We had hoped to demonstrate functional importance for HopZ1a acetylation of kinesins  
2 by comparing the growth of *P. syringae* in transgenic *Arabidopsis* plants that  
3 conditionally-overexpress either wild type HINKEL or putative acetyl-mimetic alleles  
4 (with glutamine substitutions at S88 and T90). However, despite independent cloning  
5 and transformation attempts by many of us (AHL, DPB, TL, and JZ), we were  
6 consistently unable to detect even modest expression of HA-tagged recombinant  
7 HINKEL in *Agrobacterium*-transformed *Arabidopsis* (data not shown). Although the  
8 dexamethasone-inducible expression vector we employed (Aoyama and Chua 1997)  
9 has been used successfully in the past by ourselves and by others, it is known that  
10 leaky (uninduced) expression levels from the dexamethasone-dependent promoter are  
11 not insignificant (data not shown). Coupled with an absence of available T-DNA  
12 knockout lines for *HINKEL* and *MKRP1* from the Arabidopsis Biological Resource  
13 Center (<https://abrc.osu.edu/>) (de Lucas et al. 2014), our present inability to overexpress  
14 HINKEL suggests that *Arabidopsis* plants are very sensitive to mis-regulation of these  
15 proteins and that endogenous regulatory mechanisms robustly prevent their  
16 overexpression. Although this complicates assessment of the *in planta* significance of  
17 kinesin acetylation by HopZ1a, overall our efforts highlight the potential offered by  
18 integrating functional genomic and physical interaction datasets to aid virulence target  
19 inference for T3SEs from important pathogens like *P. syringae*.

20

21

## ACKNOWLEDGEMENTS

22 This work was supported by Natural Sciences and Engineering Research Council of  
23 Canada awards to D.S.G. and D.D; a Canada Research Chair in Plant-Microbe

1 Systems Biology (D.D.) or Comparative Genomics (D.S.G.); the Centre for the Analysis  
2 of Genome Evolution and Function (D.D. and D.S.G.). This study is done in memory of  
3 Dr. Jianfeng Zhang.

4

5

## 1 REFERENCES

2

3 Alemán, A., P. Fernández-Piñar, D. Pérez-Núñez, R. Rotger, H. Martín *et al.*, 2009 A  
4 yeast-based genetic screen for identification of pathogenic *Salmonella* proteins.  
5 *FEMS Microbiol Lett* 296 (2):167-177.

6 Alfano, J.R., A.O. Charkowski, W.L. Deng, J.L. Badel, T. Petnicki-Ocwieja *et al.*, 2000  
7 The *Pseudomonas syringae* Hrp pathogenicity island has a tripartite mosaic  
8 structure composed of a cluster of type III secretion genes bounded by  
9 exchangeable effector and conserved effector loci that contribute to parasitic  
10 fitness and pathogenicity in plants. *Proc Natl Acad Sci U S A* 97 (9):4856-4861.

11 Alto, N.M., F. Shao, C.S. Lazar, R.L. Brost, G. Chua *et al.*, 2006 Identification of a  
12 bacterial type III effector family with G protein mimicry functions. *Cell* 124  
13 (1):133-145.

14 Aoyama, T., and N.H. Chua, 1997 A glucocorticoid-mediated transcriptional induction  
15 system in transgenic plants. *Plant J* 11 (3):605-612.

16 Badel, J.L., K. Nomura, S. Bandyopadhyay, R. Shimizu, A. Collmer *et al.*, 2003  
17 *Pseudomonas syringae* pv. *tomato* DC3000 HopPtoM (CEL ORF3) is important  
18 for lesion formation but not growth in tomato and is secreted and translocated by  
19 the Hrp type III secretion system in a chaperone-dependent manner. *Mol*  
20 *Microbiol* 49 (5):1239-1251.

21 Baganz, F., A. Hayes, D. Marren, D.C. Gardner, and S.G. Oliver, 1997 Suitability of  
22 replacement markers for functional analysis studies in *Saccharomyces*  
23 *cerevisiae*. *Yeast* 13 (16):1563-1573.

- 1 Baryshnikova, A., M. Costanzo, S. Dixon, F.J. Vizeacoumar, C.L. Myers *et al.*, 2010a  
2 Synthetic genetic array (SGA) analysis in *Saccharomyces cerevisiae* and  
3 *Schizosaccharomyces pombe*. *Methods Enzymol* 470:145-179.
- 4 Baryshnikova, A., M. Costanzo, Y. Kim, H. Ding, J. Koh *et al.*, 2010b Quantitative  
5 analysis of fitness and genetic interactions in yeast on a genome scale. *Nat*  
6 *Methods* 7 (12):1017-1024.
- 7 Boone, C., H. Bussey, and B.J. Andrews, 2007 Exploring genetic interactions and  
8 networks with yeast. *Nat Rev Genet* 8 (6):437-449.
- 9 Botstein, D., and G.R. Fink, 2011 Yeast: an experimental organism for 21st Century  
10 biology. *Genetics* 189 (3):695-704.
- 11 Büttner, D., and U. Bonas, 2003 Common infection strategies of plant and animal  
12 pathogenic bacteria. *Curr Opin Plant Biol* 6 (4):312-319.
- 13 Chang, J.H., J.M. Urbach, T.F. Law, L.W. Arnold, A. Hu *et al.*, 2005 A high-throughput,  
14 near-saturating screen for type III effector genes from *Pseudomonas syringae*.  
15 *Proc Natl Acad Sci U S A* 102 (7):2549-2554.
- 16 Cornelis, G.R., 2006 The type III secretion injectisome. *Nat Rev Microbiol* 4 (11):811-  
17 825.
- 18 Costanzo, M., A. Baryshnikova, J. Bellay, Y. Kim, E.D. Spear *et al.*, 2010 The genetic  
19 landscape of a cell. *Science* 327 (5964):425-431.
- 20 Curak, J., J. Rohde, and I. Stagljar, 2009 Yeast as a tool to study bacterial effectors.  
21 *Curr Opin Microbiol* 12 (1):18-23.
- 22 de Lucas, M., N.J. Provart, and S.M. Brady, 2014 Bioinformatic tools in Arabidopsis  
23 research. *Methods Mol Biol* 1062:97-136.



- 1 DebRoy, S., R. Thilmony, Y.B. Kwack, K. Nomura, and S.Y. He, 2004 A family of  
2 conserved bacterial effectors inhibits salicylic acid-mediated basal immunity and  
3 promotes disease necrosis in plants. *Proc Natl Acad Sci U S A* 101 (26):9927-  
4 9932.
- 5 Deslandes, L., and S. Rivas, 2012 Catch me if you can: bacterial effectors and plant  
6 targets. *Trends Plant Sci* 17 (11):644-655.
- 7 Dixon, S.J., M. Costanzo, A. Baryshnikova, B. Andrews, and C. Boone, 2009  
8 Systematic mapping of genetic interaction networks. *Annu Rev Genet* 43:601-  
9 625.
- 10 Dolinski, K., and D. Botstein, 2007 Orthology and functional conservation in eukaryotes.  
11 *Annu Rev Genet* 41:465-507.
- 12 Eden, E., R. Navon, I. Steinfeld, D. Lipson, and Z. Yakhini, 2009 GOrilla: a tool for  
13 discovery and visualization of enriched GO terms in ranked gene lists. *BMC*  
14 *Bioinformatics* 10:48.
- 15 Garcia-Saez, I., T. Yen, R.H. Wade, and F. Kozielski, 2004 Crystal structure of the  
16 motor domain of the human kinetochore protein CENP-E. *J Mol Biol* 340  
17 (5):1107-1116.
- 18 Giaever, G., A.M. Chu, L. Ni, C. Connelly, L. Riles *et al.*, 2002 Functional profiling of the  
19 *Saccharomyces cerevisiae* genome. *Nature* 418 (6896):387-391.
- 20 Gietz, R.D., and R.A. Woods, 2002 Transformation of yeast by lithium acetate/single-  
21 stranded carrier DNA/polyethylene glycol method. *Methods Enzymol* 350:87-96.

- 1 Hong, E.L., R. Balakrishnan, Q. Dong, K.R. Christie, J. Park *et al.*, 2008 Gene Ontology  
2 annotations at SGD: new data sources and annotation methods. *Nucleic Acids*  
3 *Res* 36 (Database issue):D577-581.
- 4 Hwang, M.S., R.L. Morgan, S.F. Sarkar, P.W. Wang, and D.S. Guttman, 2005  
5 Phylogenetic characterization of virulence and resistance phenotypes of  
6 *Pseudomonas syringae*. *Appl Environ Microbiol* 71 (9):5182-5191.
- 7 Jin, Q., R. Thilmony, J. Zwiesler-Vollick, and S.Y. He, 2003 Type III protein secretion in  
8 *Pseudomonas syringae*. *Microbes Infect* 5 (4):301-310.
- 9 Joardar, V., M. Lindeberg, R.W. Jackson, J. Selengut, R. Dodson *et al.*, 2005 Whole-  
10 genome sequence analysis of *Pseudomonas syringae* pv. *phaseolicola* 1448A  
11 reveals divergence among pathovars in genes involved in virulence and  
12 transposition. *J Bacteriol* 187 (18):6488-6498.
- 13 Komis, G., P. Illes, M. Beck, and J. Samaj, 2011 Microtubules and mitogen-activated  
14 protein kinase signalling. *Curr Opin Plant Biol*.
- 15 Kramer, R.W., N.L. Slagowski, N.A. Eze, K.S. Giddings, M.F. Morrison *et al.*, 2007  
16 Yeast functional genomic screens lead to identification of a role for a bacterial  
17 effector in innate immunity regulation. *PLoS Pathog* 3 (2):e21.
- 18 Kurat, C.F., H. Wolinski, J. Petschnigg, S. Kaluarachchi, B. Andrews *et al.*, 2009  
19 Cdk1/Cdc28-dependent activation of the major triacylglycerol lipase Tgl4 in yeast  
20 links lipolysis to cell-cycle progression. *Mol Cell* 33 (1):53-63.
- 21 Lee, A.H., B. Hurley, C. Felsensteiner, C. Yea, W. Ckurshumova *et al.*, 2012 A bacterial  
22 acetyltransferase destroys plant microtubule networks and blocks secretion.  
23 *PLoS Pathog* 8 (2):e1002523.

- 1 Lewis, J.D., W. Abada, W. Ma, D.S. Guttman, and D. Desveaux, 2008 The HopZ family  
2 of *Pseudomonas syringae* type III effectors require myristoylation for virulence  
3 and avirulence functions in *Arabidopsis thaliana*. *J Bacteriol* 190 (8):2880-2891.
- 4 Lewis, J.D., D.S. Guttman, and D. Desveaux, 2009 The targeting of plant cellular  
5 systems by injected type III effector proteins. *Semin Cell Dev Biol* 20 (9):1055-  
6 1063.
- 7 Lewis, J.D., A. Lee, W. Ma, H. Zhou, D.S. Guttman *et al.*, 2011 The YopJ superfamily in  
8 plant-associated bacteria. *Mol Plant Pathol* 12 (9):928-937.
- 9 Lewis, J.D., A.H. Lee, J.A. Hassan, J. Wan, B. Hurley *et al.*, 2013 The Arabidopsis  
10 ZED1 pseudokinase is required for ZAR1-mediated immunity induced by the  
11 *Pseudomonas syringae* type III effector HopZ1a. *Proc Natl Acad Sci U S A* 110  
12 (46):18722-18727.
- 13 Lewis, J.D., J. Wan, R. Ford, Y. Gong, P. Fung *et al.*, 2012 Quantitative Interactor  
14 Screening with next-generation Sequencing (QIS-Seq) identifies *Arabidopsis*  
15 *thaliana* MLO2 as a target of the *Pseudomonas syringae* type III effector HopZ2.  
16 *BMC Genomics* 13:8.
- 17 Ma, K.W., S. Jiang, E. Hawara, D. Lee, S. Pan *et al.*, 2015 Two serine residues in  
18 *Pseudomonas syringae* effector HopZ1a are required for acetyltransferase  
19 activity and association with the host co-factor. *New Phytol* 208 (4):1157-1168.
- 20 Ma, W., F.F. Dong, J. Stavrinos, and D.S. Guttman, 2006 Type III effector  
21 diversification via both pathoadaptation and horizontal transfer in response to a  
22 coevolutionary arms race. *PLoS Genet* 2 (12):e209.

- 1 Marchler-Bauer, A., M.K. Derbyshire, N.R. Gonzales, S. Lu, F. Chitsaz *et al.*, 2015  
2 CDD: NCBI's conserved domain database. *Nucleic Acids Res* 43 (Database  
3 issue):D222-226.
- 4 Mukhtar, M.S., A.R. Carvunis, M. Dreze, P. Epple, J. Steinbrenner *et al.*, 2011  
5 Independently evolved virulence effectors converge onto hubs in a plant immune  
6 system network. *Science* 333 (6042):596-601.
- 7 Munkvold, K.R., M.E. Martin, P.A. Bronstein, and A. Collmer, 2008 A survey of the  
8 *Pseudomonas syringae* pv. *tomato* DC3000 type III secretion system effector  
9 repertoire reveals several effectors that are deleterious when expressed in  
10 *Saccharomyces cerevisiae*. *Mol Plant Microbe Interact* 21 (4):490-502.
- 11 Munkvold, K.R., A.B. Russell, B.H. Kvitko, and A. Collmer, 2009 *Pseudomonas syringae*  
12 pv. *tomato* DC3000 type III effector HopAA1-1 functions redundantly with  
13 chlorosis-promoting factor PSPTO4723 to produce bacterial speck lesions in host  
14 tomato. *Mol Plant Microbe Interact* 22 (11):1341-1355.
- 15 Nomura, K., S. Debroy, Y.H. Lee, N. Pumplin, J. Jones *et al.*, 2006 A bacterial virulence  
16 protein suppresses host innate immunity to cause plant disease. *Science* 313  
17 (5784):220-223.
- 18 Nomura, K., C. Mecey, Y.N. Lee, L.A. Imboden, J.H. Chang *et al.*, 2011 Effector-  
19 triggered immunity blocks pathogen degradation of an immunity-associated  
20 vesicle traffic regulator in Arabidopsis. *Proc Natl Acad Sci U S A* 108 (26):10774-  
21 10779.
- 22 O'Brien, H.E., D. Desveaux, and D.S. Guttman, 2011 Next-generation genomics of  
23 *Pseudomonas syringae*. *Curr Opin Microbiol*.

- 1 Orth, K., L.E. Palmer, Z.Q. Bao, S. Stewart, A.E. Rudolph *et al.*, 1999 Inhibition of the  
2 mitogen-activated protein kinase kinase superfamily by a *Yersinia* effector.  
3 *Science* 285 (5435):1920-1923.
- 4 Orth, K., Z. Xu, M.B. Mudgett, Z.Q. Bao, L.E. Palmer *et al.*, 2000 Disruption of signaling  
5 by *Yersinia* effector YopJ, a ubiquitin-like protein protease. *Science* 290  
6 (5496):1594-1597.
- 7 Salomon, D., D. Dar, S. Sreeramulu, and G. Sessa, 2011 Expression of *Xanthomonas*  
8 *campestris* pv. *vesicatoria* type III effectors in yeast affects cell growth and  
9 viability. *Mol Plant Microbe Interact* 24 (3):305-314.
- 10 Salomon, D., and G. Sessa, 2010 Identification of growth inhibition phenotypes induced  
11 by expression of bacterial type III effectors in yeast. *J Vis Exp* (37).
- 12 Sasabe, M., V. Boudolf, L. De Veylder, D. Inze, P. Genschik *et al.*, 2011  
13 Phosphorylation of a mitotic kinesin-like protein and a MAPKKK by cyclin-  
14 dependent kinases (CDKs) is involved in the transition to cytokinesis in plants.  
15 *Proc Natl Acad Sci U S A* 108 (43):17844-17849.
- 16 Sharifpoor, S., D. van Dyk, M. Costanzo, A. Baryshnikova, H. Friesen *et al.*, 2012  
17 Functional wiring of the yeast kinome revealed by global analysis of genetic  
18 network motifs. *Genome Res* 22 (4):791-801.
- 19 Shimono, M., Y.J. Lu, K. Porter, B.H. Kvitko, J. Henty-Ridilla *et al.*, 2016 The  
20 *Pseudomonas syringae* type III effector HopG1 induces actin remodeling to  
21 promote symptom development and susceptibility during infection. *Plant Physiol*  
22 171 (3):2239-2255.

- 1 Siggers, K.A., and C.F. Lesser, 2008 The Yeast *Saccharomyces cerevisiae*: a versatile  
2 model system for the identification and characterization of bacterial virulence  
3 proteins. *Cell Host Microbe* 4 (1):8-15.
- 4 Slagowski, N.L., R.W. Kramer, M.F. Morrison, J. LaBaer, and C.F. Lesser, 2008 A  
5 functional genomic yeast screen to identify pathogenic bacterial proteins. *PLoS*  
6 *Pathog* 4 (1):e9.
- 7 Sopko, R., D. Huang, N. Preston, G. Chua, B. Papp *et al.*, 2006 Mapping pathways and  
8 phenotypes by systematic gene overexpression. *Mol Cell* 21 (3):319-330.
- 9 Strompen, G., F. El Kasm, S. Richter, W. Lukowitz, F.F. Assaad *et al.*, 2002 The  
10 Arabidopsis HINKEL gene encodes a kinesin-related protein involved in  
11 cytokinesis and is expressed in a cell cycle-dependent manner. *Curr Biol* 12  
12 (2):153-158.
- 13 Takahashi, Y., T. Soyano, K. Kosetsu, M. Sasabe, and Y. Machida, 2010 HINKEL  
14 kinesin, ANP MAPKKs and MKK6/ANQ MAPKK, which phosphorylates and  
15 activates MPK4 MAPK, constitute a pathway that is required for cytokinesis in  
16 *Arabidopsis thaliana*. *Plant Cell Physiol* 51 (10):1766-1776.
- 17 Tong, A.H., M. Evangelista, A.B. Parsons, H. Xu, G.D. Bader *et al.*, 2001 Systematic  
18 genetic analysis with ordered arrays of yeast deletion mutants. *Science* 294  
19 (5550):2364-2368.
- 20 Tong, A.H., G. Lesage, G.D. Bader, H. Ding, H. Xu *et al.*, 2004 Global mapping of the  
21 yeast genetic interaction network. *Science* 303 (5659):808-813.

- 1 Wilton, M., R. Subramaniam, J. Elmore, C. Felsensteiner, G. Coaker *et al.*, 2010 The  
2 type III effector HopF2Pto targets Arabidopsis RIN4 protein to promote  
3 *Pseudomonas syringae* virulence. *Proc Natl Acad Sci U S A* 107 (5):2349-2354.
- 4 Winzeler, E.A., D.D. Shoemaker, A. Astromoff, H. Liang, K. Anderson *et al.*, 1999  
5 Functional characterization of the *S. cerevisiae* genome by gene deletion and  
6 parallel analysis. *Science* 285 (5429):901-906.
- 7 Ye, P., B.D. Peyser, X. Pan, J.D. Boeke, F.A. Spencer *et al.*, 2005 Gene function  
8 prediction from congruent synthetic lethal interactions in yeast. *Mol Syst Biol*  
9 1:2005 0026.
- 10 Yoon, S., Z. Liu, Y. Eyobo, and K. Orth, 2003 Yersinia effector YopJ inhibits yeast  
11 MAPK signaling pathways by an evolutionarily conserved mechanism. *J Biol*  
12 *Chem* 278 (4):2131-2135.
- 13 Zhou, J.M., and J. Chai, 2008 Plant pathogenic bacterial type III effectors subdue host  
14 responses. *Curr Opin Microbiol* 11 (2):179-185.
- 15 Zhu, C., and R. Dixit, 2012 Functions of the Arabidopsis kinesin superfamily of  
16 microtubule-based motor proteins. *Protoplasma* 249 (4):887-899.

17

18

1 **FIGURE LEGENDS**

2

3 **Figure 1. Growth inhibition profiles of yeast (Y7092) expressing 75 *P. syringae***

4 **T3SEs on rich media (YP Galactose), rich media with 1 M sorbitol (YPG + 1M**

5 **Sorb), and rich media with 1 M NaCl (YPG + 1M Na). The growth inhibition by each**

6 T3SE at each condition is represented in numbers and heat map, with 1 (or white)

7 corresponding to no growth inhibition to 0 (or red) corresponding to complete growth

8 inhibition. The fitness numbers are calculated for every condition by normalizing the

9 fitness of yeast expressing T3SE to the negative control strain containing the integrated

10 *NAT<sup>R</sup>* antibiotic cassette at the *HO* locus.

11

12 **Figure 2. Analysis of HopZ1a suppressors and negative genetic interactors in**

13 **yeast.** Diagram showing (A) negative genetic interactors, and (B) suppressors of

14 HopZ1a generated using Cytoscape. Nodes are colour coded based on annotations of

15 biological processes from Costanzo *et al.* (Costanzo et al. 2010). The HopZ1a

16 suppressors showed an enrichment in GTPase-mediated signal transduction (gray-

17 shaded box;  $p=0.006$ ).

18

19 **Figure 3. Congruence gene analyses of HopZ1a negative genetic interactors**

20 **identify microtubule motor proteins as potential targets. (A)** A model for the

21 molecular mechanism of enhancing T3SE toxicity by targeting redundant pathways. A

22 mutation in either one of the parallel redundant pathways (b\* or the inhibition of X by

23 T3SE) does not alter cell viability. However, when both pathways are disrupted (b\* and



1 the inhibition of X by T3SE), the cells are not viable. **(B)** Congruence analysis predicts  
2 potential T3SE targets by identifying yeast genes (gene X) with similar genetic  
3 interaction profiles as the T3SE. **(C)** 81 congruent yeast genes with congruence score  $\geq$   
4 2 are shown, with nodes color coded based on annotations of biological processes from  
5 Constanzo *et al.* (Costanzo et al. 2010). HopZ1a is congruent to yeast deletion strains  
6 that are enriched for replication fork processing ( $p < 0.0001$ ) and microtubule-based  
7 processes (with a  $p < 0.0004$ ) as analyzed by GOrilla tool (Eden et al. 2009). Genes  
8 enriched in microtubule-based processes are circled in red, and genes enriched for  
9 replication fork processing are circled in black. Edge thickness is proportional to  
10 congruence scores.

11  
12 **Figure 4. HopZ1a acetylates *A. thaliana* kinesins HINKEL and MKRP1 when co-**  
13 **expressed in yeast.** Predicted domain architectures (as annotated by the NCBI  
14 Conserved Domain Database; (Marchler-Bauer et al. 2015) for HINKEL (A), MKRP1 (B)  
15 and HopZ1a (A and B) are indicated above horizontal bands representing the mass  
16 spectrometry sequence coverage for each protein. Black bands indicate sequences  
17 identified with high confidence, while grey bands indicate sequences that were not  
18 reliably detected. Red vertical stripes indicate the position of acetylated residues.  
19

| Effector       | Pathovars   | YP Galactose | YPG + 1M Sorb | YPG + 1M Na |
|----------------|-------------|--------------|---------------|-------------|
| AvrB2-3        | Pph1448a    | 1            | 1             | 1           |
| AvrB2/ AvrB2-3 | Pph1448a    | 1            | 1             | 1           |
| AvrE1          | Pph1448a    | 0.1          | 0.1           | 0           |
| AvrE1          | PsyB728a    | 0.1          | 0             | 0           |
| AvrPto1        | PsyB728a    | 1            | 1             | 1           |
| AvrPto1        | PtoDC3000   | 1            | 1             | 1           |
| AvrRps4        | Pph1448a    | 1            | 1             | 1           |
| HopA1          | PtoDC3000   | 1            | 1             | 1           |
| HopAA1         | PmaES4326   | 0.2          | 0.2           | 0.5         |
| HopAA1         | PsyB728a    | 0.1          | 0             | 0           |
| HopAA1-1       | PtoDC3000   | 0.5          | 0.1           | 0.5         |
| HopAA1-2       | PtoDC3000   | 1            | 0.6           | 0.3         |
| HopAB1         | Pph1448a    | 1            | 1             | 1           |
| HopAB1         | PsyB728a    | 1            | 1             | 1           |
| HopAB2         | PtoDC3000   | 1            | 1             | 1           |
| HopAB3-1       | PmaES4326   | 1            | 1             | 1           |
| HopAB3-2       | PmaES4326   | 1            | 1             | 1           |
| HopAD1         | PtoDC3000   | 0.2          | 0.4           | 0.5         |
| HopAE1         | Pph1448a    | 0.9          | 1             | 0.7         |
| HopAE1         | PsyB728a    | 0.6          | 0.7           | 0.2         |
| HopAF1         | Pph1448a    | 1            | 1             | 1           |
| HopAF1         | PsyB728a    | 1            | 1             | 1           |
| HopAF1         | PtoDC3000   | 1            | 1             | 1           |
| HopAG1         | PsyB728a    | 0.4          | 0.5           | 0.2         |
| HopAK1         | PmaES4326   | 1            | 1             | 1           |
| HopAL1         | PmaES4326   | 1            | 1             | 1           |
| HopAO1         | PtoDC3000   | 1            | 0.7           | 0.5         |
| HopAT1         | Pph1448a    | 1            | 1             | 1           |
| HopAV1         | Pph1448a    | 1            | 1             | 0           |
| HopBB1         | PavBPIC631  | 0.3          | 0.2           | 0.2         |
| HopC1          | PtoDC3000   | 1            | 1             | 1           |
| HopD1          | Pph1448a    | 1            | 1             | 1           |
| HopD1          | PtoDC3000   | 1            | 1             | 1           |
| HopE1          | PtoDC3000   | 1            | 1             | 1           |
| HopF1          | Pph1449b    | 1            | 1             | 1           |
| HopF1          | PphY5-2     | 1            | 1             | 1           |
| HopF2          | PseHC-1     | 1            | 1             | 1           |
| HopF2          | PtoDC3000   | 1            | 1             | 1           |
| HopF2          | PtoT1       | 0.5          | 0.3           | 0.3         |
| HopF3          | PaeNcPpB368 | 1            | 1             | 1           |
| HopF3          | PavBPIC631  | 1            | 1             | 1           |
| HopF3          | Pph1302A    | 1            | 1             | 1           |
| HopF3          | Pph1448a    | 1            | 1             | 1           |
| HopF4          | PsvNCPB333  | 1            | 1             | 1           |
| HopG1          | Pph1448a    | 0.1          | 0.1           | 0.2         |
| HopG1          | PtoDC3000   | 1            | 0.8           | 1           |
| HopH1          | PsyB728a    | 1            | 1             | 1           |
| HopH1          | PtoDC3000   | 1            | 1             | 1           |
| HopI1          | PmaES4326   | 1            | 1             | 1           |
| HopI1          | Pph1448a    | 1            | 1             | 1           |
| HopI1          | PsyB728a    | 1            | 1             | 1           |
| HopI1          | PtoDC3000   | 1            | 1             | 1           |
| HopJ1          | PmaES4326   | 1            | 1             | 1           |
| HopM1          | Pph1448a    | 1            | 1             | 1           |
| HopM1          | PsyB728a    | 0.1          | 0.1           | 0.5         |
| HopN1          | PtoDC3000   | 1            | 1             | 0.7         |
| HopP1          | PtoDC3000   | 1            | 1             | 1           |
| HopQ1-1        | Pph1448a    | 1            | 1             | 1           |
| HopQ1-1        | PtoDC3000   | 1            | 1             | 1           |
| HopR1          | Pph1448a    | 1            | 1             | 1           |
| HopT1-1        | PtoDC3000   | 1            | 0.8           | 0.7         |
| HopV1          | PtoDC3000   | 1            | 1             | 1           |
| HopW1-1        | PmaES4326   | 0.1          | 0             | 0.2         |
| HopW1-2        | PmaES4326   | 1            | 1             | 1           |
| HopW1-2        | Pph1448a    | 1            | 1.1           | 1           |
| HopX1          | PmaES4326   | 0.6          | 0.6           | 0           |
| HopX1          | PsyB728a    | 0.5          | 0.3           | 0           |
| HopX1          | PtoDC3000   | 1            | 0.5           | 0.2         |
| HopX2          | PmaES4326   | 1            | 1             | 1           |
| HopY1          | PtoDC3000   | 1            | 1             | 1           |
| HopZ1a         | PsyA2       | 1            | 1             | 0.7         |
| HopZ1b         | PgyUnb647   | 1            | 1             | 1           |
| HopZ1c         | PmaES4326   | 1            | 1             | 1           |
| HopZ2          | Ppi895a     | 1            | 1             | 1           |
| HopZ3          | PsyB728a    | 1            | 1             | 1           |

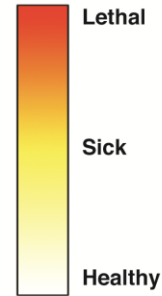

Figure 1

**A**

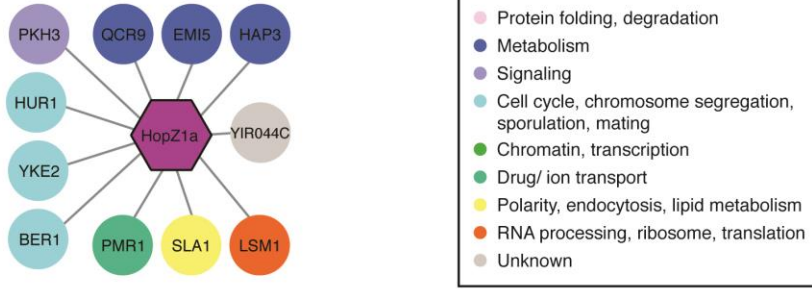

**B**

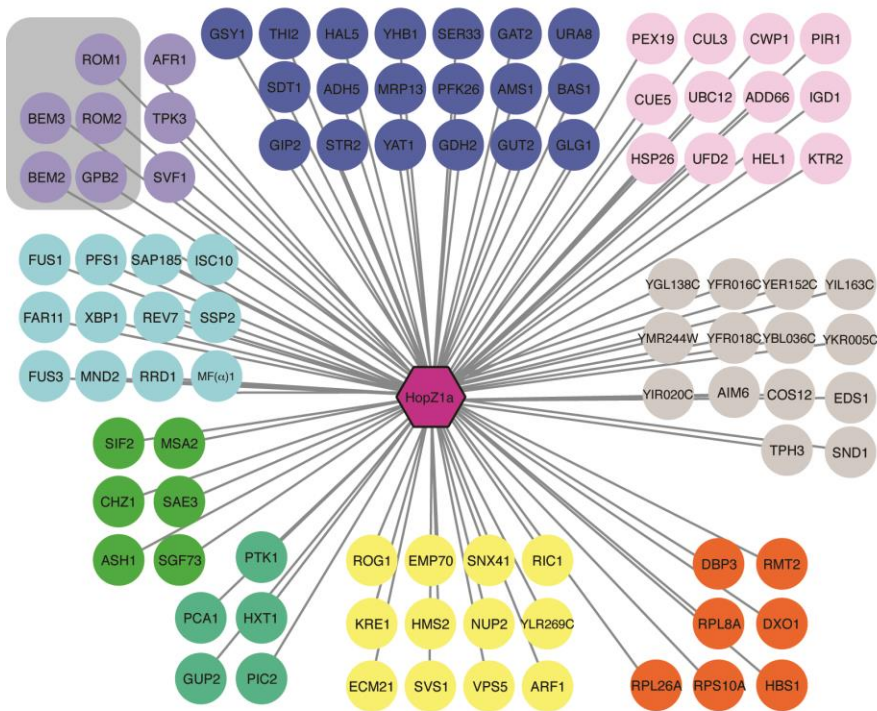

**Figure 2**

1

2

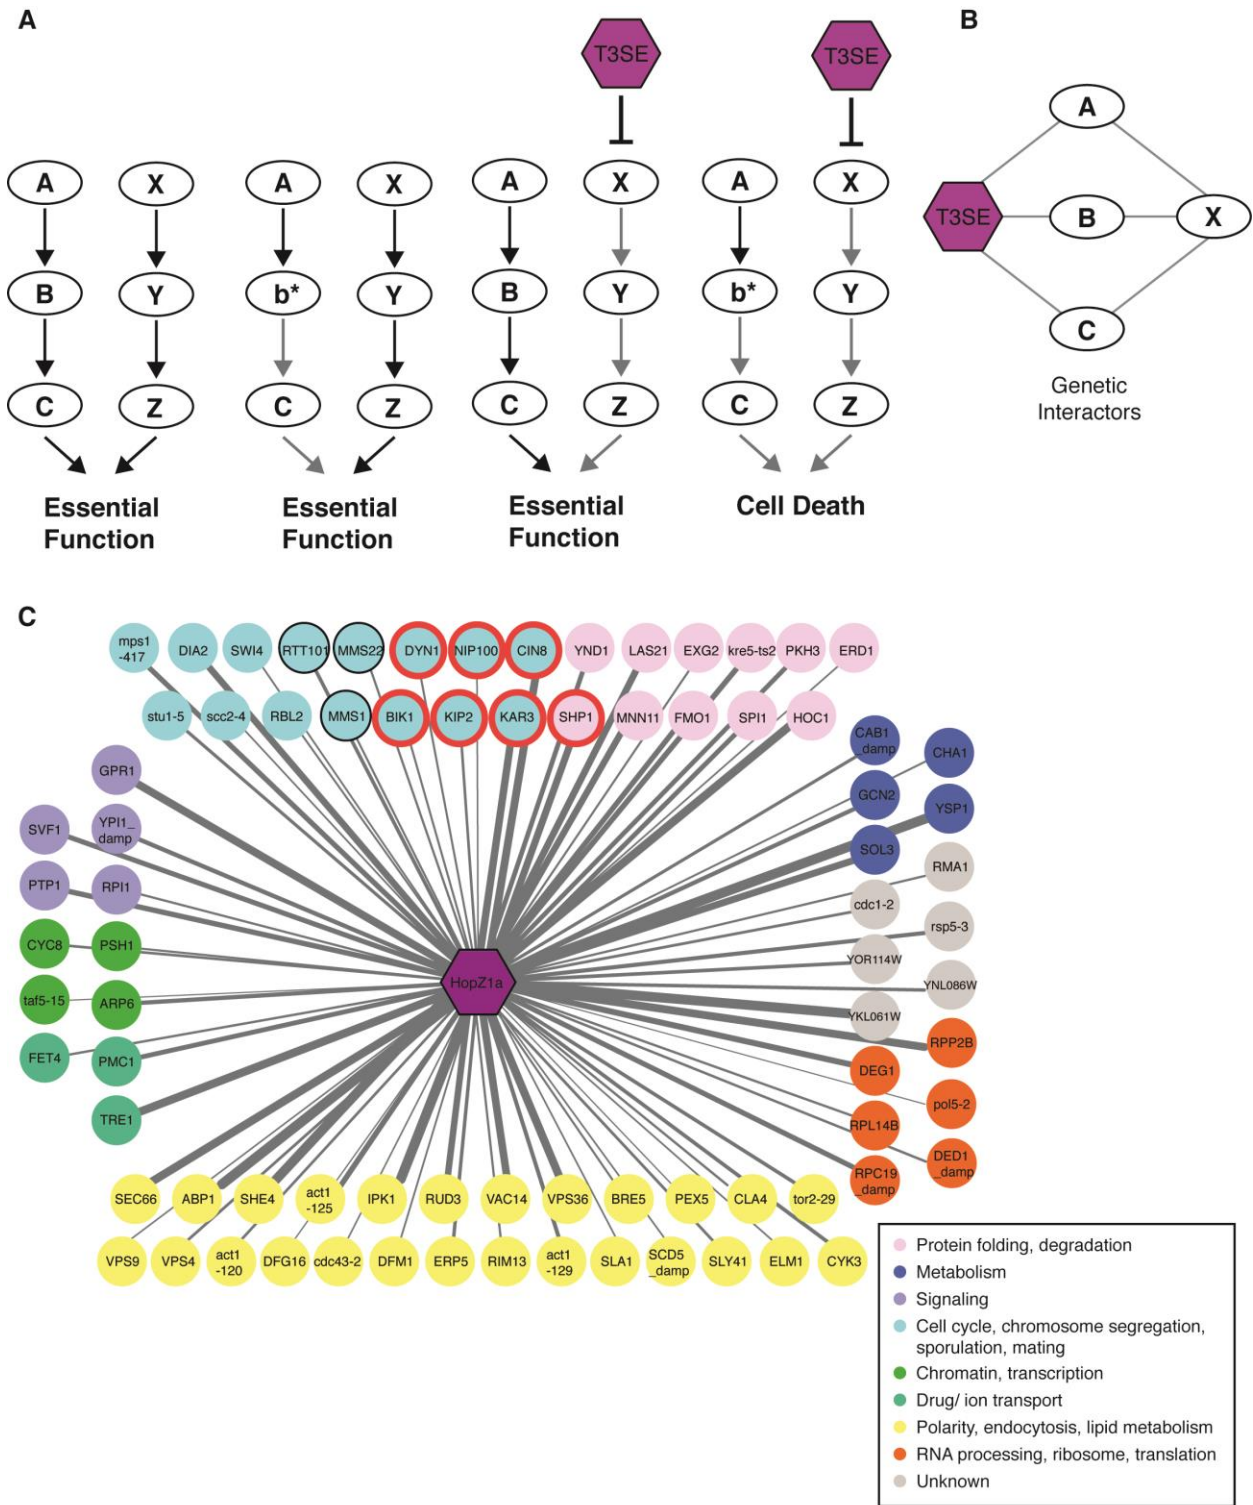

Figure 3

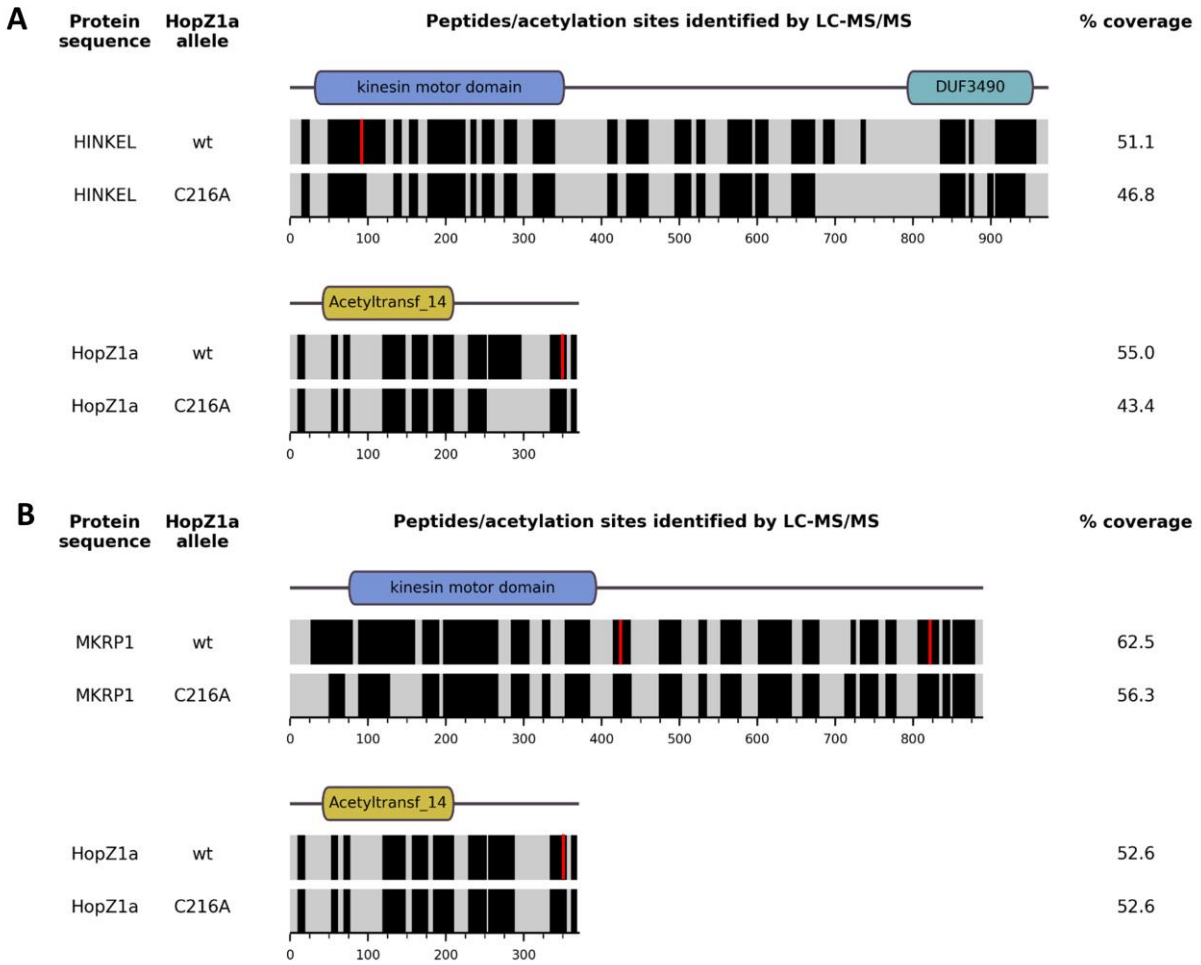

1

2

Figure 4
